# Supplementary material for: EUS-Guided Gallbladder Drainage Using a Lumen-Apposing Metal Stent for Acute Cholecystitis: Results of a Nationwide Study with Long-Term Follow-Up
Source: MDPI journal article supplement (doi:10.3390/diagnostics14040413), 2024-02-13
Supplement: s1 [file s1]

**Supplementary Table S1.** Type of LAMS used and technique.

| Variable                                                                                                                                                                                           | N (%)                                                                       |
|----------------------------------------------------------------------------------------------------------------------------------------------------------------------------------------------------|-----------------------------------------------------------------------------|
| Stent type <ul style="list-style-type: none"> <li>Hot axios</li> <li>Nagi</li> </ul>                                                                                                               | 107/116 (92.2)<br>9/116 (7.8)                                               |
| Hot axios Stent dimension (width x length) <ul style="list-style-type: none"> <li>10 mm x 10 mm</li> <li>15 mm x 10 mm</li> <li>8 mm x 8 mm</li> <li>6 mm x 8 mm</li> <li>20 mm x 10 mm</li> </ul> | 82/116 (70.7)<br>19/116 (16.4)<br>4/116 (3.4)<br>1/116 (0.9)<br>1/116 (0.9) |
| Nagi Stent dimension (width x length) <ul style="list-style-type: none"> <li>12 mm x 20 mm</li> <li>16 mm x 20 mm</li> <li>12 mm x 30 mm</li> </ul>                                                | 7/116 (6.3)<br>1/116 (0.9)<br>1/116 (0.9)                                   |
| Gallbladder access <ul style="list-style-type: none"> <li>Transgastric</li> <li>Transduodenal</li> <li>Transjejunal</li> </ul>                                                                     | 51/116 (44.8)<br>62/116 (53.3)<br>2/116 (1.7)                               |
| Step for access into common bile duct <ul style="list-style-type: none"> <li>single stage</li> <li>multiple steps</li> </ul>                                                                       | 101/116 (87.1)<br>15/116 (12.9)                                             |
| Release of the 2nd flange <ul style="list-style-type: none"> <li>Intrachannel</li> <li>Under fluoroscopic view</li> </ul>                                                                          | 76/116 (67.2)<br>45/116 (38.8)                                              |
